# Supplementary material for: Prevention and management of adverse events of novel agents in multiple myeloma: a consensus of the European Myeloma Network
Source: PubMed Central journal article supplement — Leukemia. 2018 May 2;32(7):1542–60. doi: 10.1038/s41375-018-0040-1 (PMC6035147; doi:10.1038/s41375-018-0040-1), 2018-05-02
Supplement: 41375_2018_40_MOESM1_ESM.pdf [file 41375_2018_40_MOESM1_ESM.pdf]

**Online supplementary material**

**Prevention and Management of Adverse Events of Novel Agents in Multiple  
Myeloma: A Consensus of the European Myeloma Network**

**Table S1. Novel agents EMA and/or FDA approved in multiple myeloma and overview of pivotal trials [as per 10/2017]**

|        |                               | NDMM – eligible for ASCT                                                           |                          | NDMM – not eligible for ASCT                                              | RRMM                                                                                                                                                                        |
|--------|-------------------------------|------------------------------------------------------------------------------------|--------------------------|---------------------------------------------------------------------------|-----------------------------------------------------------------------------------------------------------------------------------------------------------------------------|
|        |                               | Induction                                                                          | Maintenance              | Primary therapy                                                           | Salvage therapy                                                                                                                                                             |
| IMiDs  | Thalidomide <sup>1,2</sup>    | ✓ (EMA: age ≥65, MPT; FDA: TD)<br>IFM 99-06 <sup>3</sup> , ECOG E1A00 <sup>4</sup> |                          | ✓ (EMA: MPT; FDA: TD)<br>IFM 99-06 <sup>3</sup> , ECOG E1A00 <sup>4</sup> |                                                                                                                                                                             |
|        | Lenalidomide <sup>5,6</sup>   | ✓ (FDA approval only; Rd)<br>ECOG E4A03 <sup>7</sup>                               | ✓ (EMA: R mono; FDA: Rd) | ✓ (EMA: Rd, MPR-R; FDA: Rd)<br>MM-020 <sup>8</sup> , MM-015 <sup>9</sup>  | ✓* (Rd)<br>MM-009/MM-010 <sup>10-12</sup>                                                                                                                                   |
|        | Pomalidomide <sup>13,14</sup> |                                                                                    |                          |                                                                           | ✓** (Pom-D)<br>NIMBUS <sup>15</sup>                                                                                                                                         |
| PIs    | Bortezomib <sup>16,17</sup>   | ✓ (EMA: VD; VDT; FDA: VMP)<br>IFM-2005-01 <sup>18</sup>                            | ✓                        | ✓ (VMP)<br>VISTA <sup>19</sup>                                            | ✓ (EMA: V mono, V-PLD; FDA: V mono, Vd)<br>APEX <sup>20,21</sup> , SUMMIT <sup>22</sup> , MMY-2045 <sup>21</sup> , DOXIL-MMY-3001 <sup>21,23</sup> , RETRIEVE <sup>24</sup> |
|        | Carfilzomib <sup>25,26</sup>  |                                                                                    |                          |                                                                           | ✓* (KRd, Kd; K mono FDA approved only)<br>ASPIRE <sup>27</sup> , ENDEAVOR <sup>28</sup> , FOCUS <sup>29</sup> , FX-171-003-A1 <sup>30</sup>                                 |
|        | Ixazomib <sup>31,32</sup>     |                                                                                    |                          |                                                                           | ✓* (Ixa-Rd)<br>TOURMALINE-MM1 <sup>33</sup>                                                                                                                                 |
| HDACis | Panobinostat <sup>34,35</sup> |                                                                                    |                          |                                                                           | ✓** (Pan-Vd)<br>PANORAMA-1 <sup>36</sup> , PANORAMA-2 <sup>37</sup>                                                                                                         |
| mAbs   | Elotuzumab <sup>38,39</sup>   |                                                                                    |                          |                                                                           | ✓* (Elo-Rd)<br>ELOQUENT-2 <sup>40-42</sup>                                                                                                                                  |

|  |                              |  |  |  |                                                                                                                                                                                                                                                         |
|--|------------------------------|--|--|--|---------------------------------------------------------------------------------------------------------------------------------------------------------------------------------------------------------------------------------------------------------|
|  | Daratumumab <sup>43,44</sup> |  |  |  | <b>✓ (Dara mono;<br/> ** EMA; *** FDA)</b><br>SIRIUS <sup>45</sup> , GEN501 <sup>46</sup><br><b>✓ (Dara-Vd, Dara-Rd;<br/> * EMA; * FDA)</b><br>CASTOR <sup>47</sup> , POLLUX <sup>48</sup><br><b>✓ (Dara-Pom-Dex; ** FDA)</b><br>EQUULEUS <sup>49</sup> |
|--|------------------------------|--|--|--|---------------------------------------------------------------------------------------------------------------------------------------------------------------------------------------------------------------------------------------------------------|

ASCT, autologous stem cell transplantation; d, dexamethasone; HDACis, histone deacetylase inhibitors; IMiDs, immunomodulatory agents; Ixa-Ixazomib; K, carfilzomib; M, melphalan; mABs, monoclonal antibodies; NDMM, newly diagnosed multiple myeloma; P, prednisone; PIs, proteasome inhibitors; PLD, pegylated liposomal doxorubicin; R, lenalidomide; RRMM, relapsed and/or refractory multiple myeloma; V, bortezomib, \* at least 1 prior therapy; \*\* at least 2 prior therapies; \*\*\* at least 3 prior therapies; Sources: [www.ema.europa.eu](http://www.ema.europa.eu), [www.accessdata.fda.gov](http://www.accessdata.fda.gov)

**Table S2A. Immunomodulatory agents: Grade ≥3 adverse events reported in pivotal trials**

| IMiDs                             | Thalidomide       |                 | Lenalidomide              |                   |                     | Pomalidomide        |
|-----------------------------------|-------------------|-----------------|---------------------------|-------------------|---------------------|---------------------|
|                                   | MP-T <sup>3</sup> | TD <sup>4</sup> | Rd <sup>7, 8, 10-12</sup> | MPR† <sup>9</sup> | MPR-R† <sup>9</sup> | Pom-d <sup>15</sup> |
| <b>Hematological disorders</b>    |                   |                 |                           |                   |                     |                     |
| Anemia                            | 14%               |                 | 3-18%                     | 27%               | 29%                 | 33%                 |
| Neutropenia                       | 48%               |                 | 7-41%                     | 100%              | 96%                 | 48%                 |
| Febrile neutropenia               |                   |                 | 2%                        | 7%                | 3%                  | 10%                 |
| Thrombocytopenia                  | 14%               |                 | 2-15%                     | 47%               | 51%                 | 22%                 |
| Leukopenia                        |                   |                 | 5-6%                      | 27%               | 31%                 | 9%                  |
| Lymphopenia                       |                   |                 | 3-6%                      |                   |                     |                     |
| <b>Infection</b>                  | 13%               | 2%              | 2-29%                     | 10%               | 15%                 | 34%                 |
| Herpes zoster                     | 3%                |                 |                           |                   |                     |                     |
| Pneumonia                         | 7%                | 5%              | 8-12%                     |                   |                     | 14%                 |
| Septicemia                        | 3%                |                 |                           |                   |                     |                     |
| Meningitis                        | 2%                |                 |                           |                   |                     |                     |
| <b>Gastrointestinal disorders</b> |                   |                 |                           |                   |                     |                     |
| Nausea                            | 1%                | 4%              | 1-3%                      |                   |                     | 1%                  |

| IMiDs                                     | Thalidomide |    | Lenalidomide |    |    | Pomalidomide |
|-------------------------------------------|-------------|----|--------------|----|----|--------------|
|                                           |             |    |              |    |    |              |
| Constipation                              | 10%         | 8% | 2-3%         |    |    | 2%           |
| Diarrhea                                  |             |    | 3-4%         | 3% | 1% | 1%           |
| <b>Musculoskeletal disorders and pain</b> |             |    |              |    |    |              |
| Non-neuropathic weakness                  |             |    | 4-11%        |    |    |              |
| Muscle weakness                           |             | 6% | 6-7%         |    |    | 1%           |
| Back pain                                 |             |    | 2-7%         |    |    | 7%           |
| Bone pain                                 |             |    | 1-5%         |    |    | 7%           |
| <b>Mineral imbalances</b>                 |             |    |              |    |    |              |
| Hypokalemia                               |             |    | 4-7%         |    |    |              |
| Hypercalcemia                             |             | 8% |              |    |    | 4%           |
| Hyponatremia                              |             | 4% |              |    |    |              |
| <b>Cardiac disorders</b>                  | 2%          |    | 6-12%        | 5% | 5% |              |
| Arrhythmia                                | 2%          |    |              |    |    |              |
| Cardiac ischemia                          |             |    | <1-3%        |    |    |              |
| Atrial fibrillation or flutter            |             |    | <1-3%        |    |    |              |
| Hypotension                               |             | 4% |              |    |    |              |

| IMiDs                  | Thalidomide |                          | Lenalidomide |    |    | Pomalidomide |
|------------------------|-------------|--------------------------|--------------|----|----|--------------|
| <b>Others</b>          |             |                          |              |    |    |              |
| Peripheral neuropathy  | 6%          | 4% (sensory); 7% (motor) | <1%-2%       |    |    |              |
| Thrombosis or embolism | 12%         | 20%                      | 2-26%        | 1% | 5% |              |
| Fatigue                | 8%‡         | 15%                      | 3-15%        | 5% | 2% | 5%           |
| Asthenia               |             |                          | 3-8%         |    |    | 3%           |
| Hyperglycemia          |             | 15%                      | 4-11%        |    |    |              |
| Rash                   |             | 4%                       | 6%           | 5% | 5% |              |
| Cataracts              |             |                          | 3-6%         |    |    |              |
| Dyspnea                |             | 11%                      | 3-6%         |    |    | 5%           |
| Edema                  |             | 6%                       |              |    |    |              |
| Hypoxia                |             | 3%                       |              |    |    |              |
| Seizure                |             | 3%                       |              |    |    |              |
| Syncope                |             | 3%                       |              |    |    |              |

D, dexamethasone; IMiD, immunomodulatory agent; M, melphalan; n.r., not reported; P, prednisone; Pom, pomalidomide; R, lenalidomide; T, thalidomide

Note: Adverse events with a reported incidence >2% in the original publication are listed; if an adverse event was reported to have an incidence >2% in one given regimen, the incidence of that adverse event is listed for all regimens. †Induction phase only; ‡Is listed as combined event of somnolence/fatigue/dizziness in the original publication<sup>3</sup>, but listed in the fatigue category in this table.

**Table S2B. Proteasome inhibitors: Grade ≥3 adverse events reported in pivotal trials**

| PIs                               | Bortezomib              |                          |                     |                       | Carfilzomib              |                  |                   | Ixazomib          |
|-----------------------------------|-------------------------|--------------------------|---------------------|-----------------------|--------------------------|------------------|-------------------|-------------------|
|                                   | V mono <sup>19-23</sup> | Vd <sup>18, 21, 24</sup> | V-PLD <sup>23</sup> | KRd <sup>50, 51</sup> | K mono <sup>29, 30</sup> | Kd <sup>28</sup> | KRd <sup>27</sup> | IRd <sup>33</sup> |
| <b>Hematological disorders</b>    |                         |                          |                     |                       |                          |                  |                   |                   |
| Anemia                            | 9-19%                   | 4-5%                     | 9%                  | 13%                   | 24-25%                   | 14%              |                   | 9%                |
| Neutropenia                       | 14- 40%                 | 4-7%                     | 29%                 | 19%                   | 8-11%                    |                  |                   | 23%               |
| Thrombocytopenia                  | 16-37%                  | 3-35%                    | 22%                 | 18%                   | 24-39%                   | 9%               |                   | 19%               |
| Leukopenia                        | 23%                     |                          |                     | 14%                   | 3%                       |                  |                   |                   |
| Lymphopenia                       | 19%                     |                          |                     | 23%                   | 23%                      |                  |                   |                   |
| <b>Neurologic disorders</b>       |                         |                          |                     |                       |                          |                  |                   |                   |
| Peripheral neuropathy             | 8-13%                   | 7-18%                    |                     | 24%                   | 1%                       | 1%               |                   | 2%                |
| Neuralgia                         | 8-9%                    |                          | 3%                  |                       |                          | <1%              |                   |                   |
| <b>Infection</b>                  | 13-16%                  | 9-17%                    |                     |                       |                          |                  |                   |                   |
| Herpes zoster                     | 3-13%                   |                          |                     |                       |                          |                  |                   |                   |
| Pneumonia                         | 7%                      | 6%                       |                     |                       | 6-9%                     |                  |                   |                   |
| Upper respiratory tract infection |                         |                          |                     |                       | 5%                       | 2%               | 2%                | <1%               |
| <b>Cardiac disorders</b>          | 3%                      |                          | 2%                  |                       |                          |                  |                   |                   |

| PIs                               | Bortezomib |    |    |    | Carfilzomib |     |      | Ixazomib |
|-----------------------------------|------------|----|----|----|-------------|-----|------|----------|
|                                   |            |    |    |    |             |     |      |          |
| Arrhythmia                        |            |    |    |    |             |     |      | 5%       |
| Hypertension                      |            |    |    |    | 3%          | 9%  | 4.3% | 2%       |
| Cardiac failure                   |            |    |    |    | 2%          |     | 4%   |          |
| Ischemic heart disease            |            |    |    |    |             |     | 3%   |          |
| <b>Gastrointestinal disorders</b> |            |    |    |    |             |     |      |          |
| Nausea                            | <1-6%      |    | 2% |    | 1-2%        | 1%  |      | 2%       |
| Vomiting                          | 1-8%       |    | 4% |    | <1%         | 1%  |      | 1%       |
| Diarrhea                          | 4-8%       | 7% | 7% | 8% | <1%         | 3%  | 4%   | 6%       |
| <b>Pain</b>                       |            |    |    |    |             |     |      |          |
| Back pain                         | 3%         |    |    |    |             | <1% |      | <1%      |
| Bone pain                         | 4%         |    |    |    |             |     |      |          |
| Pain in extremity                 | 2-7%       |    |    |    |             | <1% |      |          |
| <b>Mineral imbalances</b>         |            |    |    |    |             |     |      |          |
| Hypokalemia                       | 7%         |    |    | 9% |             |     | 9%   |          |
| Hypercalcemia                     |            |    |    |    | 4%          |     |      |          |
| Hypophosphatemia                  |            |    |    |    | 6%          |     |      |          |



| PIs                       | Bortezomib |    |    |     | Carfilzomib |    |    | Ixazomib |
|---------------------------|------------|----|----|-----|-------------|----|----|----------|
|                           |            |    |    |     |             |    |    |          |
| Hyponatremia              |            |    |    |     | 8%          |    |    |          |
| <b>Renal function</b>     |            |    |    |     |             |    |    |          |
| Acute renal failure       |            |    |    |     | 3-10%       |    | 3% |          |
| Renal impairment          |            |    |    |     | 2-7%        |    |    |          |
| <b>Others</b>             |            |    |    |     |             |    |    |          |
| Thrombosis or embolism    | 1%         | 2% |    | 8%  |             |    |    | 2%       |
| Fatigue                   | 2-12%      |    | 6% | 16% | 8%          | 5% | 8% | 4%       |
| Asthenia                  | 3-6%       |    | 6% |     |             | 3% |    |          |
| Rash                      | <1-1%      |    |    |     |             |    |    | 7%       |
| Dyspnea                   | 4-5%       |    |    |     | 1-3%        | 5% | 3% |          |
| Myopathy                  |            |    |    | 7%  |             |    |    |          |
| Hyperglycemia             |            |    |    | 7%  |             |    |    |          |
| Dehydration               |            |    |    | 3%  |             |    |    |          |
| Second primary malignancy |            |    |    | 8%  |             |    |    |          |

D, dexamethasone; I, ixazomib; K, carfilzomib; mono, monotherapy; PI, proteasome inhibitor; PLD, pegylated liposomal doxorubicin; R, lenalidomide; V, bortezomib

Note: Adverse events with a reported incidence >2% in the original publication are listed; if an adverse event was reported to have an incidence >2% in one given regimen, the incidence of that adverse event is listed for all regimens. In RETRIEVE<sup>24</sup>, 28% of patients received bortezomib monotherapy (V mono) and 72% received a combination of bortezomib and dexamethasone (V-dex). For this study, adverse events were not reported separately for these treatment groups. Since the majority of patients received V-dex, adverse events for this study have been reported in the V-dex column. In SUMMIT<sup>22</sup>, patients received bortezomib monotherapy; in those with suboptimal response, dexamethasone was added. Only bortezomib-related adverse

events were reported. Therefore, the adverse events are shown in the V mono column. The FX-171-003-A1 study<sup>30</sup> reports all grade and grade 3 or 4 adverse events irrespective of cause and carfilzomib-related adverse events of all grades. In this table grade, 3 or 4 adverse events irrespective of cause are reported.

Note: VRd is not a regimen tested in pivotal trials. VRd has, however, been well researched in the phase III SWOG S0777 trial and is widely used and thus included in this table for completeness. Adverse event incidence was taken from the publication at ASH 2015<sup>51</sup>; newer data is available as full publication,<sup>50</sup> but shows CTCAE categories only, which do not match categories used within this table.

**Table S2C. Histone deacetylase inhibitors: Grade  $\geq 3$  adverse events reported in pivotal trials**

| HDACis                         | Panobinostat                    | HDACis                            | Panobinostat                    |
|--------------------------------|---------------------------------|-----------------------------------|---------------------------------|
|                                | <b>Pan-Vd</b> <sup>36, 37</sup> |                                   | <b>Pan-Vd</b> <sup>36, 37</sup> |
| <b>Hematological disorders</b> |                                 | <b>Gastrointestinal disorders</b> |                                 |
| Anemia                         | 15-58%                          | Nausea                            | 5-6%                            |
| Neutropenia                    | 15-35%                          | Vomiting                          | 7%                              |
| Thrombocytopenia               | 64-68%                          | Diarrhea                          | 20-25%                          |
| Leukopenia                     | 62%                             | Decreased appetite                | 3%                              |
| Lymphopenia                    | 68%                             | Flatulence                        | 6-7%                            |
| <b>Neurologic disorders</b>    |                                 | <b>Others</b>                     |                                 |
| Peripheral neuropathy          | 17%                             | Peripheral edema                  | 2%                              |
| Headache                       | 3%                              | Hypotension                       | 2-9%                            |
| Dizziness                      | 3%                              | Fatigue or Asthenia               | 24-29%                          |
| Infection                      |                                 | Abdominal pain                    | 2-6%                            |
| Pneumonia                      | 13-15%                          | Dehydration                       | 5%                              |
| Sepsis/septic shock            | 6-9%                            | Syncope                           | 9%                              |
| <b>Mineral imbalances</b>      |                                 |                                   |                                 |

| <b>HDACis</b>    | <b>Panobinostat</b> | <b>HDACis</b> | <b>Panobinostat</b> |
|------------------|---------------------|---------------|---------------------|
| Hypokalemia      | 7%                  |               |                     |
| Hypophosphatemia | 6%                  |               |                     |

D, dexamethasone; HDACi, histone deacetylase inhibitor; Pan, panobinostat; V, bortezomib

Note: Adverse events with a reported incidence >2% in the original publication are listed; if an adverse event was reported to have an incidence >2% in one given regimen, the incidence of that adverse event is listed for all regimens.

**Table S2D. Monoclonal antibodies: Grade  $\geq 3$  adverse events reported in pivotal trials**

| MAbs                              | Elotuzumab           | Daratumumab                 |                       |                       |                          |
|-----------------------------------|----------------------|-----------------------------|-----------------------|-----------------------|--------------------------|
|                                   | Elo-Rd <sup>40</sup> | Dara mono <sup>45, 46</sup> | Dara-Rd <sup>48</sup> | Dara-Vd <sup>47</sup> | Dara-Pom-d <sup>52</sup> |
| <b>Hematological disorders</b>    |                      |                             |                       |                       |                          |
| Anemia                            |                      | 24%                         | 12%                   | 14%                   | 28%                      |
| Neutropenia                       | 34%                  | 12%                         | 52%                   | 13%                   | 77%                      |
| Febrile neutropenia               |                      |                             | 6%                    |                       | 8%                       |
| Thrombocytopenia                  | 19%                  | 19%                         | 13%                   | 45%                   | 19%                      |
| Leukopenia                        |                      |                             |                       |                       | 24%                      |
| Lymphopenia                       | 19%                  |                             | 5%                    | 10%                   |                          |
| <b>Neurologic disorders</b>       |                      |                             |                       |                       |                          |
| Peripheral neuropathy             |                      |                             |                       | 5%                    |                          |
| <b>Infection</b>                  |                      |                             |                       |                       | 32%                      |
| Pneumonia                         |                      |                             | 8%                    | 8%                    |                          |
| Upper respiratory tract infection |                      |                             |                       |                       | 3%                       |
| <b>Others</b>                     |                      |                             |                       |                       |                          |
| Fatigue                           | 8%                   | 1-3%                        | 6%                    | 5%                    | 12%                      |

|                            |    |    |    |    |    |
|----------------------------|----|----|----|----|----|
| Pyrexia                    | 3% | 1% |    |    | 2% |
| Diarrhea                   | 5% |    | 5% | 4% | 4% |
| Back pain                  | 5% | 3% |    |    | 6% |
| Dyspnea                    |    |    | 3% | 4% | 8% |
| Hypertension               |    |    |    | 7% |    |
| Hyperglycemia              |    |    |    |    | 8% |
| Fall                       |    |    |    |    | 6% |
| Infusion-related reactions |    |    |    |    | 4% |

D, dexamethasone; Dara, daratumumab; Elo, elotuzumab; R, lenalidomide

Note: Adverse events with a reported incidence >2% in the original publication are listed; if an adverse event was reported to have an incidence >2% in one given regimen, the incidence of that adverse event is listed for all regimens

**Table S3. Special warnings and precautions with regards to toxicities of chemotherapy and corticosteroid backbone as per USPI / EU SmPC**

|                      |                         | Teratogenicity | Cardiac disorders | Neuromuscular effects | Thrombocytopenia | Leukopenia     | Neutropenia    | Anemia         | Infections     | Viral/bacterial reactivation | Hypertension | GI perforation | SPM            | Allergic/hypersensitivity reactions | Infusion reaction | Hepatic impairment | Renal impairment | Electrolyte imbalances | Cataracts/ophthalmic effects | Pulmonary disorders | Mood/behavior disturbances | Endocrine disorders | Bone density decrease | Hand-foot syndrome |
|----------------------|-------------------------|----------------|-------------------|-----------------------|------------------|----------------|----------------|----------------|----------------|------------------------------|--------------|----------------|----------------|-------------------------------------|-------------------|--------------------|------------------|------------------------|------------------------------|---------------------|----------------------------|---------------------|-----------------------|--------------------|
| Glucocorticosteroids | Dexamethasone           |                | •                 | •                     |                  |                |                |                | •              |                              | •            | •              |                |                                     |                   |                    | •                | •                      | •                            |                     | •                          | •                   | •                     |                    |
|                      | Prednisone              | •              | •                 | •                     |                  |                |                |                | •              | •                            | •            | •              | • <sup>a</sup> |                                     |                   |                    | •                |                        | •                            |                     | •                          | •                   | •                     |                    |
| Alkylating agent     | Cyclophosphamide        | •              | •                 |                       | • <sup>b</sup>   | • <sup>b</sup> | • <sup>b</sup> | • <sup>b</sup> | • <sup>c</sup> |                              |              |                | •              |                                     |                   | •                  | •                | •                      |                              | •                   |                            |                     |                       |                    |
|                      | Melphalan               | •              |                   |                       | •                | •              | •              | •              |                |                              |              |                | •              | •                                   |                   |                    |                  |                        |                              |                     |                            |                     |                       |                    |
| Anthracycline        | Doxorubicin (liposomal) | •              | •                 |                       |                  |                |                |                |                |                              |              |                | •              |                                     | •                 |                    |                  |                        |                              |                     |                            |                     |                       | •                  |

a. Kaposi's sarcoma; b. hematological toxicities include bone marrow failure; c. includes sepsis and septic shock  
GI, gastrointestinal

## References

1. European Medicines Agency. Thalidomide Celgene: EPAR - Product Information. 2015 [cited 2016 10 November]; Available from: [http://www.ema.europa.eu/docs/en\\_GB/document\\_library/EPAR\\_-\\_Product\\_Information/human/000823/WC500037050.pdf](http://www.ema.europa.eu/docs/en_GB/document_library/EPAR_-_Product_Information/human/000823/WC500037050.pdf)
2. United States Food and Drug Administration. Thalidomide Celgene: Label Information. 2015 [cited 2016 10 November]; Available from: [http://www.accessdata.fda.gov/drugsatfda\\_docs/label/2015/020785s051lbl.pdf](http://www.accessdata.fda.gov/drugsatfda_docs/label/2015/020785s051lbl.pdf)
3. Facon T, Mary JY, Hulin C, Benboubker L, Attal M, Pegourie B, *et al.* Melphalan and prednisone plus thalidomide versus melphalan and prednisone alone or reduced-intensity autologous stem cell transplantation in elderly patients with multiple myeloma (IFM 99-06): a randomised trial. *Lancet* 2007 Oct 06; **370**(9594): 1209-1218.
4. Rajkumar SV, Blood E, Vesole D, Fonseca R, Greipp PR, Eastern Cooperative Oncology G. Phase III clinical trial of thalidomide plus dexamethasone compared with dexamethasone alone in newly diagnosed multiple myeloma: a clinical trial coordinated by the Eastern Cooperative Oncology Group. *J Clin Oncol* 2006 Jan 20; **24**(3): 431-436.
5. European Medicines Agency. Revlimid: EPAR - Product Information. 2017 [cited 2017 03 October]; Available from: [http://www.ema.europa.eu/docs/en\\_GB/document\\_library/EPAR\\_-\\_Product\\_Information/human/000717/WC500056018.pdf](http://www.ema.europa.eu/docs/en_GB/document_library/EPAR_-_Product_Information/human/000717/WC500056018.pdf)
6. United States Food and Drug Administration. Revlimid: Label Information. 2017 [cited 2017 03 October]; Available from: [https://www.accessdata.fda.gov/drugsatfda\\_docs/label/2017/021880s051lbl.pdf](https://www.accessdata.fda.gov/drugsatfda_docs/label/2017/021880s051lbl.pdf)
7. Rajkumar SV, Jacobus S, Callander NS, Fonseca R, Vesole DH, Williams ME, *et al.* Lenalidomide plus high-dose dexamethasone versus lenalidomide plus low-dose dexamethasone as initial therapy for newly diagnosed multiple myeloma: an open-label randomised controlled trial. *Lancet Oncol* 2010 Jan; **11**(1): 29-37.
8. Benboubker L, Dimopoulos MA, Dispenzieri A, Catalano J, Belch AR, Cavo M, *et al.* Lenalidomide and dexamethasone in transplant-ineligible patients with myeloma. *N Engl J Med* 2014 Sep 04; **371**(10): 906-917.
9. Palumbo A, Hajek R, Delforge M, Kropff M, Petrucci MT, Catalano J, *et al.* Continuous lenalidomide treatment for newly diagnosed multiple myeloma. *N Engl J Med* 2012 May 10; **366**(19): 1759-1769.
10. Dimopoulos MA, Chen C, Spencer A, Niesvizky R, Attal M, Stadtmauer EA, *et al.* Long-term follow-up on overall survival from the MM-009 and MM-010 phase III trials of lenalidomide plus dexamethasone in patients with relapsed or refractory multiple myeloma. *Leukemia* 2009 Nov; **23**(11): 2147-2152.



11. Weber DM, Chen C, Niesvizky R, Wang M, Belch A, Stadtmauer EA, *et al.* Lenalidomide plus dexamethasone for relapsed multiple myeloma in North America. *N Engl J Med* 2007 Nov 22; **357**(21): 2133-2142.
12. Dimopoulos M, Spencer A, Attal M, Prince HM, Harousseau JL, Dmoszynska A, *et al.* Lenalidomide plus dexamethasone for relapsed or refractory multiple myeloma. *N Engl J Med* 2007 Nov 22; **357**(21): 2123-2132.
13. European Medicines Agency. Imnovid: EPAR - Product Information. 2017 [cited 2017 03 October]; Available from: [http://www.ema.europa.eu/docs/en\\_GB/document\\_library/EPAR\\_-\\_Product\\_Information/human/000717/WC500056018.pdf](http://www.ema.europa.eu/docs/en_GB/document_library/EPAR_-_Product_Information/human/000717/WC500056018.pdf)
14. United States Food and Drug Administration. Pomalyst: Label Information. 2016 [cited 2017 03 October]; Available from: [https://www.accessdata.fda.gov/drugsatfda\\_docs/label/2016/204026s012s014lbl.pdf](https://www.accessdata.fda.gov/drugsatfda_docs/label/2016/204026s012s014lbl.pdf)
15. San Miguel J, Weisel K, Moreau P, Lacy M, Song K, Delforge M, *et al.* Pomalidomide plus low-dose dexamethasone versus high-dose dexamethasone alone for patients with relapsed and refractory multiple myeloma (MM-003): a randomised, open-label, phase 3 trial. *Lancet Oncol* 2013 Oct; **14**(11): 1055-1066.
16. European Medicines Agency. Velcade: EPAR - Product Information. 2016 [cited 2016 3 December]; Available from: [http://www.ema.europa.eu/docs/en\\_GB/document\\_library/EPAR\\_-\\_Product\\_Information/human/000539/WC500048471.pdf](http://www.ema.europa.eu/docs/en_GB/document_library/EPAR_-_Product_Information/human/000539/WC500048471.pdf).
17. United States Food and Drug Administration. Velcade: Label Information. 2017 [cited 2017 03 October]; Available from: [https://www.accessdata.fda.gov/drugsatfda\\_docs/label/2017/021602s043lbl.pdf](https://www.accessdata.fda.gov/drugsatfda_docs/label/2017/021602s043lbl.pdf)
18. Harousseau JL, Attal M, Avet-Loiseau H, Marit G, Caillot D, Mohty M, *et al.* Bortezomib plus dexamethasone is superior to vincristine plus doxorubicin plus dexamethasone as induction treatment prior to autologous stem-cell transplantation in newly diagnosed multiple myeloma: results of the IFM 2005-01 phase III trial. *J Clin Oncol* 2010 Oct 20; **28**(30): 4621-4629.
19. San Miguel JF, Schlag R, Khuageva NK, Dimopoulos MA, Shpilberg O, Kropff M, *et al.* Bortezomib plus melphalan and prednisone for initial treatment of multiple myeloma. *N Engl J Med* 2008 Aug 28; **359**(9): 906-917.
20. Richardson PG, Sonneveld P, Schuster MW, Irwin D, Stadtmauer EA, Facon T, *et al.* Bortezomib or high-dose dexamethasone for relapsed multiple myeloma. *N Engl J Med* 2005 Jun 16; **352**(24): 2487-2498.

21. Dimopoulos MA, Orłowski RZ, Facon T, Sonneveld P, Anderson KC, Beksac M, *et al.* Retrospective matched-pairs analysis of bortezomib plus dexamethasone versus bortezomib monotherapy in relapsed multiple myeloma. *Haematologica* 2015 Jan; **100**(1): 100-106.
22. Richardson PG, Barlogie B, Berenson J, Singhal S, Jagannath S, Irwin D, *et al.* A phase 2 study of bortezomib in relapsed, refractory myeloma. *N Engl J Med* 2003 Jun 26; **348**(26): 2609-2617.
23. Orłowski RZ, Nagler A, Sonneveld P, Blade J, Hajek R, Spencer A, *et al.* Randomized phase III study of pegylated liposomal doxorubicin plus bortezomib compared with bortezomib alone in relapsed or refractory multiple myeloma: combination therapy improves time to progression. *J Clin Oncol* 2007 Sep 01; **25**(25): 3892-3901.
24. Petrucci MT, Giraldo P, Corradini P, Teixeira A, Dimopoulos MA, Blau IW, *et al.* A prospective, international phase 2 study of bortezomib retreatment in patients with relapsed multiple myeloma. *Br J Haematol* 2013 Mar; **160**(5): 649-659.
25. European Medicines Agency. Kyprolis: EPAR - Product Information. 2017 [cited 2017 03 October]; Available from: [http://www.ema.europa.eu/docs/en\\_GB/document\\_library/EPAR\\_-\\_Product\\_Information/human/003790/WC500197692.pdf](http://www.ema.europa.eu/docs/en_GB/document_library/EPAR_-_Product_Information/human/003790/WC500197692.pdf)
26. United States Food and Drug Administration. Kyprolis: Label Information. 2017 [cited 2017 03 October]; Available from: [https://www.accessdata.fda.gov/drugsatfda\\_docs/label/2017/202714s016lbl.pdf](https://www.accessdata.fda.gov/drugsatfda_docs/label/2017/202714s016lbl.pdf)
27. Stewart AK, Rajkumar SV, Dimopoulos MA, Masszi T, Spicka I, Oriol A, *et al.* Carfilzomib, lenalidomide, and dexamethasone for relapsed multiple myeloma. *N Engl J Med* 2015 Jan 08; **372**(2): 142-152.
28. Dimopoulos MA, Moreau P, Palumbo A, Joshua D, Pour L, Hajek R, *et al.* Carfilzomib and dexamethasone versus bortezomib and dexamethasone for patients with relapsed or refractory multiple myeloma (ENDEAVOR): a randomised, phase 3, open-label, multicentre study. *Lancet Oncol* 2016 Jan; **17**(1): 27-38.
29. Hajek R, Masszi T, Petrucci MT, Palumbo A, Rosinol L, Nagler A, *et al.* A randomized phase III study of carfilzomib vs low-dose corticosteroids with optional cyclophosphamide in relapsed and refractory multiple myeloma (FOCUS). *Leukemia* 2017 Jan; **31**(1): 107-114.
30. Siegel DS, Martin T, Wang M, Vij R, Jakubowiak AJ, Lonial S, *et al.* A phase 2 study of single-agent carfilzomib (PX-171-003-A1) in patients with relapsed and refractory multiple myeloma. *Blood* 2012 Oct 04; **120**(14): 2817-2825.
31. European Medicines Agency. Ninlaro: CHMP - positive opinion. 2016 [cited 2016 3 December]; Available from:

[http://www.ema.europa.eu/docs/en\\_GB/document\\_library/Medicine\\_QA/2016/09/WC500212895.pdf](http://www.ema.europa.eu/docs/en_GB/document_library/Medicine_QA/2016/09/WC500212895.pdf)

32. United States Food and Drug Administration. Ninlaro: Label Information. 2016 [cited 2017 03 October]; Available from:  
[https://www.accessdata.fda.gov/drugsatfda\\_docs/label/2016/208462s001lbl.pdf](https://www.accessdata.fda.gov/drugsatfda_docs/label/2016/208462s001lbl.pdf)
33. Moreau P, Masszi T, Grzasko N, Bahlis NJ, Hansson M, Pour L, *et al.* Oral Ixazomib, Lenalidomide, and Dexamethasone for Multiple Myeloma. *N Engl J Med* 2016 Apr 28; **374**(17): 1621-1634.
34. European Medicines Agency. Farydak: EPAR - Product Information. 2017 [cited 2017 03 October]; Available from:  
[http://www.ema.europa.eu/docs/en\\_GB/document\\_library/EPAR\\_-\\_Product\\_Information/human/003725/WC500193298.pdf](http://www.ema.europa.eu/docs/en_GB/document_library/EPAR_-_Product_Information/human/003725/WC500193298.pdf)
35. United States Food and Drug Administration. Farydak: Label Information. 2015 [cited 2017 03 October]; Available from:  
[https://www.accessdata.fda.gov/drugsatfda\\_docs/label/2015/205353s000lbl.pdf](https://www.accessdata.fda.gov/drugsatfda_docs/label/2015/205353s000lbl.pdf)
36. San-Miguel JF, Hungria VT, Yoon SS, Beksac M, Dimopoulos MA, Elghandour A, *et al.* Panobinostat plus bortezomib and dexamethasone versus placebo plus bortezomib and dexamethasone in patients with relapsed or relapsed and refractory multiple myeloma: a multicentre, randomised, double-blind phase 3 trial. *Lancet Oncol* 2014 Oct; **15**(11): 1195-1206.
37. Richardson PG, Schlossman RL, Alsina M, Weber DM, Coutre SE, Gasparetto C, *et al.* PANORAMA 2: panobinostat in combination with bortezomib and dexamethasone in patients with relapsed and bortezomib-refractory myeloma. *Blood* 2013 Oct 03; **122**(14): 2331-2337.
38. European Medicines Agency. Empliciti: EPAR - Product Information. 2017 [cited 2017 3 October]; Available from:  
[http://www.ema.europa.eu/docs/en\\_GB/document\\_library/EPAR\\_-\\_Product\\_Information/human/003967/WC500206673.pdf](http://www.ema.europa.eu/docs/en_GB/document_library/EPAR_-_Product_Information/human/003967/WC500206673.pdf)
39. United States Food and Drug Administration. Empliciti: Label Information. 2017 [cited 2017 03 October]; Available from:  
[https://www.accessdata.fda.gov/drugsatfda\\_docs/label/2017/761035s005lbl.pdf](https://www.accessdata.fda.gov/drugsatfda_docs/label/2017/761035s005lbl.pdf)
40. Lonial S, Dimopoulos M, Palumbo A, White D, Grosicki S, Spicka I, *et al.* Elotuzumab Therapy for Relapsed or Refractory Multiple Myeloma. *N Engl J Med* 2015 Aug 13; **373**(7): 621-631.
41. Dimopoulos MA, Lonial S, White D, Moreau P, Palumbo A, San Miguel J, *et al.* Eloquent-2 Update: A Phase 3, Randomized, Open-Label Study of Elotuzumab in Combination with Lenalidomide/Dexamethasone in Patients with

Relapsed/Refractory Multiple Myeloma - 3-Year Safety and Efficacy Follow-up. *Blood* 2015; **126**(23): 28-28.

42. Lonial S, Dimopoulos MA, Palumbo A, White D, Grosicki S, Spicka I, *et al.* ELOQUENT-2: A phase III, randomized, open-label study of lenalidomide (Len)/dexamethasone (dex) with/without elotuzumab (Elo) in patients (pts) with relapsed/refractory multiple myeloma (RRMM). *J Clin Oncol* 2015; **33**(suppl): abstr 8508.
43. European Medicines Agency. Darzalex: EPAR - Product Information. 2017 [cited 2017 03 October]; Available from: [http://www.ema.europa.eu/docs/en\\_GB/document\\_library/EPAR\\_-\\_Product\\_Information/human/004077/WC500207296.pdf](http://www.ema.europa.eu/docs/en_GB/document_library/EPAR_-_Product_Information/human/004077/WC500207296.pdf)
44. United States Food and Drug Administration. Darzalex: Label Information. 2017 [cited 2017 03 October]; Available from: [https://www.accessdata.fda.gov/drugsatfda\\_docs/label/2017/761036s005lbl.pdf](https://www.accessdata.fda.gov/drugsatfda_docs/label/2017/761036s005lbl.pdf)
45. Lonial S, Weiss BM, Usmani SZ, Singhal S, Chari A, Bahlis NJ, *et al.* Daratumumab monotherapy in patients with treatment-refractory multiple myeloma (SIRIUS): an open-label, randomised, phase 2 trial. *Lancet* 2016 Apr 09; **387**(10027): 1551-1560.
46. Lokhorst HM, Plesner T, Laubach JP, Nahi H, Gimsing P, Hansson M, *et al.* Targeting CD38 with Daratumumab Monotherapy in Multiple Myeloma. *N Engl J Med* 2015 Sep 24; **373**(13): 1207-1219.
47. Palumbo A, Chanan-Khan A, Weisel K, Nooka AK, Masszi T, Beksac M, *et al.* Daratumumab, Bortezomib, and Dexamethasone for Multiple Myeloma. *N Engl J Med* 2016 Aug 25; **375**(8): 754-766.
48. Dimopoulos MA, Oriol A, Nahi H, San-Miguel J, Bahlis NJ, Usmani SZ, *et al.* Daratumumab, Lenalidomide, and Dexamethasone for Multiple Myeloma. *N Engl J Med* 2016 Oct 06; **375**(14): 1319-1331.
49. Jakubowiak AJ, Chari A, Lonial S, Weiss BM, Comenzo RL, Wu K, *et al.* Daratumumab (DARA) in combination with carfilzomib, lenalidomide, and dexamethasone (KRd) in patients (pts) with newly diagnosed multiple myeloma (MMY1001): An open-label, phase 1b study. *J Clin Oncol* 2017; **35**(suppl.): abstr 8000.
50. Durie BG, Hoering A, Abidi MH, Rajkumar SV, Epstein J, Kahanic SP, *et al.* Bortezomib with lenalidomide and dexamethasone versus lenalidomide and dexamethasone alone in patients with newly diagnosed myeloma without intent for immediate autologous stem-cell transplant (SWOG S0777): a randomised, open-label, phase 3 trial. *Lancet* 2017 Feb 04; **389**(10068): 519-527.
51. Durie B, Hoering A, Rajkumar SV, Abidi MH, Epstein J, Kahanic SP, *et al.* Bortezomib, Lenalidomide and Dexamethasone Vs. Lenalidomide and Dexamethasone in Patients (Pts) with Previously Untreated Multiple Myeloma without an Intent for Immediate

Autologous Stem Cell Transplant (ASCT): Results of the Randomized Phase III Trial SWOG S0777. *Blood* 2015; **126**: abstract 25.

52. Chari A, Suvannasankha A, Fay JW, Arnulf B, Kaufman JL, Ifthikharuddin JJ, *et al.* Daratumumab plus pomalidomide and dexamethasone in relapsed and/or refractory multiple myeloma. *Blood* 2017 Aug 24; **130**(8): 974-981.
